# Supplementary material for: Estimating global ammonia (NH 3 ) emissions based on IASI observations from 2008 to 2018
Source: Copernicus journal article supplement (doi:10.5194/acp-2022-216), 2022-03-31
Supplement: Supplementary file 1 [file acp-2022-216-supplement.pdf]

## Supplement of

# Estimating global ammonia (NH<sub>3</sub>) emissions based on IASI observations from 2008 to 2018

Zhenqi Luo et al.

Correspondence to: Y. Zhang (zhangyuzhong@westlake.edu.cn), Z. Luo (zl725@cornell.edu)

### Supplementary

**Table S1.** Uncertainty and sensitivity analyses of top-down NH<sub>3</sub> emissions. Annual averaged NH<sub>3</sub> emissions are summed over global land areas for 2008–2018.

|   | Parameter perturbed                      | Average emission (Tg a <sup>-1</sup> ) |
|---|------------------------------------------|----------------------------------------|
| 0 | TDE <sup>a</sup>                         | 79                                     |
| 1 | Halved lifetime <sup>b</sup>             | 96                                     |
| 2 | Doubled lifetime <sup>c</sup>            | 71                                     |
| 3 | Upper IASI column error                  | 84                                     |
| 4 | Lower IASI column error                  | 75                                     |
| 5 | Number of retrievals > 400 <sup>d</sup>  | 84                                     |
| 6 | Number of retrievals > 1200 <sup>e</sup> | 76                                     |
| 7 | Transport/Emission < 0.2 <sup>f</sup>    | 74                                     |
| 8 | Transport/Emission < 5 <sup>g</sup>      | 86                                     |

<sup>a</sup>Excluding a grid cell if retrieval number is less than 800 during a month, or transport dominates over emissions or depositions in the simulated monthly NH<sub>3</sub> budget.

<sup>b-c</sup>The lifetime is 50 % and 200 % of values from Eq. (1), respectively.

<sup>d-e</sup>Monthly retrieval number threshold for including a grid cell is set to be 400 and 1200, respectively.

<sup>f-g</sup>Local budget ratio the threshold for including a grid cell is set to be 0.2 and 5, respectively.

**Table 2.** Consistency evaluation of simulated NH<sub>3</sub> concentrations against IASI observations using full-chemistry simulations driven by different emission datasets (BUE1 and TDE) in 2008, 2013 and 2018.

| Year | number<br>of<br>grids | Emission | R <sup>2</sup> | RMSE <sup>a</sup> | FB |
|------|-----------------------|----------|----------------|-------------------|----|
|------|-----------------------|----------|----------------|-------------------|----|

|      |      |      |      |       |      |
|------|------|------|------|-------|------|
|      |      | TDE  | 0.32 | 12.44 | 0.18 |
| 2008 | 9971 | BUE1 | 0.40 | 7.83  | -    |
|      |      |      |      |       | 0.30 |
|      |      | TDE  | 0.54 | 7.34  | 0.08 |
| 2013 | 8957 | BUE1 | 0.37 | 8.02  | -    |
|      |      |      |      |       | 0.19 |
|      |      | TDE  | 0.62 | 8.54  | 0.08 |
| 2018 | 8599 | BUE1 | 0.31 | 10.55 | -    |
|      |      |      |      |       | 0.32 |

17 <sup>a</sup>In  $10^{-5} \text{ mol m}^{-2}$ .

18

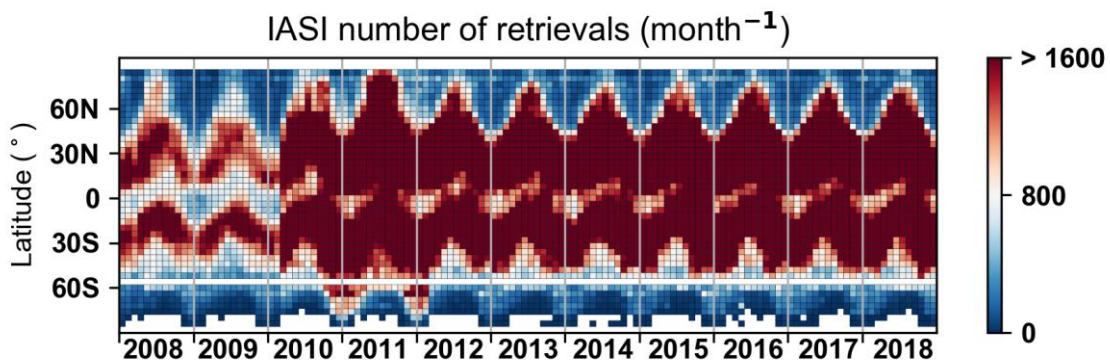

19

20 **Figure S1.** Number of satellite retrievals by latitude and by month during 2008-2018.

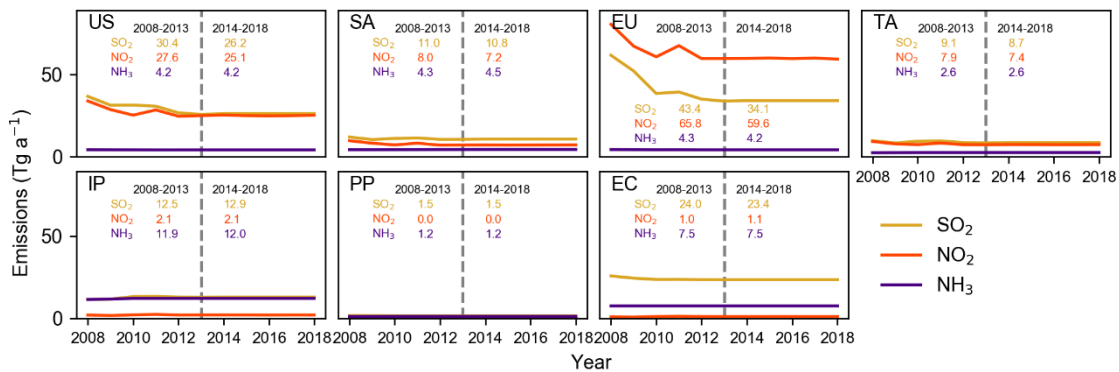

21

22 **Figure S2.** Annual anthropogenic emissions of NH<sub>3</sub>, NO<sub>2</sub> and SO<sub>2</sub> from BUE1 for seven selected regions between  
 23 2008-2018. Average annual emissions (Tg a<sup>-1</sup>) for 2008-2013 and 2014-2018 are inset.

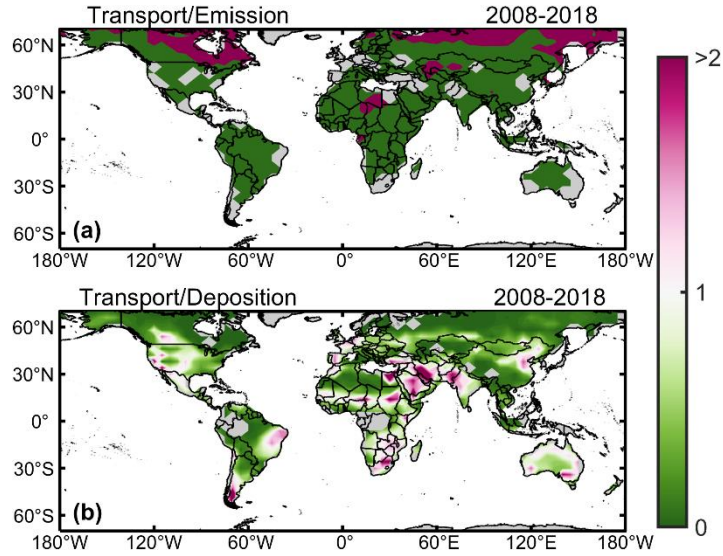

24

25 **Figure S3.** Spatial distribution of (a) positive transport to emission and (b) negative transport to deposition ratios  
 26 during 2008-2018.

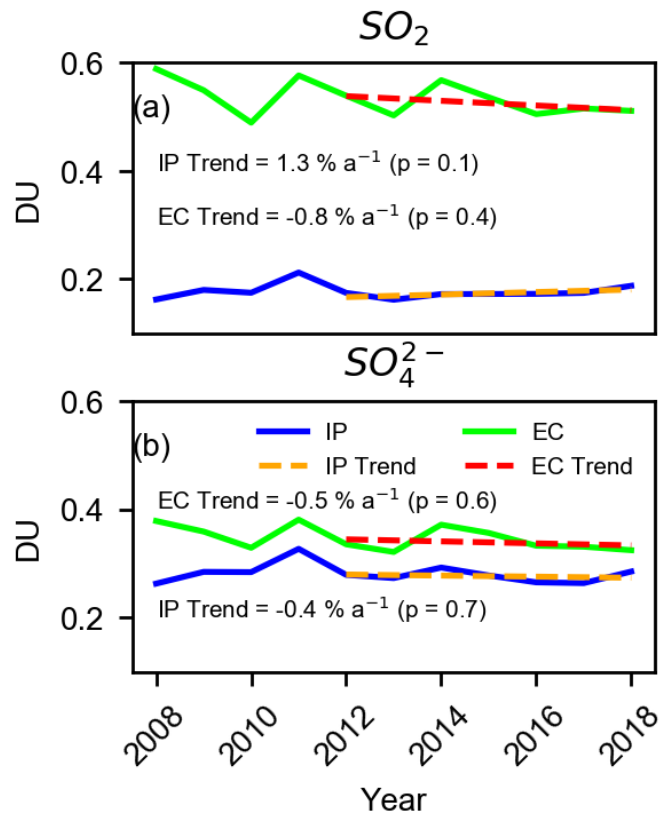

27

28 **Figure S4.** Annual average of simulated (a)  $SO_2$  and (b)  $SO_4^{2-}$  over IP and EC (two regions in Fig. 2) during 2008-  
 29 2018. The simulation is driven by BUE1 (Fig. S2). Relative linear trends and their p values for 2012-2018 are inset.  
 30 1 DU =  $2.69 \times 10^{16}$  molecules  $\text{cm}^{-2}$ .

31
